# Supplementary material
Source: MDPI journal article supplement (https://www.mdpi.com/2079-9292/11/2/216)
Supplement: s1 [file s1]

Archive with 1 entries (1 files):
- electronics-1523181-supplementary.pdf
